# Supplementary material for: Regulation of surface kinetics: rapid growth of n-AlGaN with high conductivity for deep-ultraviolet light emitters
Source: Royal Society of Chemistry journal article supplement (doi:10.1039/d2ce00362g), 2022-01-01
Supplement: d2ce00362g1.pdf [file d2ce00362g1.pdf]

## Supplementary Information

### Regulation of surface kinetics: Rapid growth of n-AlGaN with high conductivity for deep-ultraviolet light emitters

Jiaming Wang,<sup>a</sup> Fujun Xu,<sup>\*a</sup> Jing Lang,<sup>a</sup> Xuzhou Fang,<sup>a</sup> Liubing Wang,<sup>a</sup> Xueqi Guo,<sup>a</sup> Chen Ji,<sup>a</sup> Xiangning Kang,<sup>a</sup> Zhixin Qin,<sup>a</sup> Xuelin Yang,<sup>a</sup> Xinqiang Wang,<sup>abc</sup> Weikun Ge,<sup>a</sup> and Bo Shen<sup>abc</sup>

<sup>a</sup> State Key Laboratory of Artificial Microstructure and Mesoscopic Physics, School of Physics, Peking University, Beijing 100871, China

<sup>b</sup> Nano-optoelectronics Frontier Center of Ministry of Education, Peking University, Beijing 100871, China

<sup>c</sup> Collaborative Innovation Center of Quantum Matter, Beijing 100871, China

\*E-mail: fjxu@pku.edu.cn

#### I. Calculation-related parameters

Since the supersaturation of Al is several orders of magnitude higher than that of Ga,<sup>1</sup> in other words, the surface diffusion capability of Al is much weaker than Ga, the Al nucleation on the terrace is much easier to occur than Ga during AlGa<sub>N</sub> growth, making it the main limit of the growth rate. Therefore, the correlation between the growth temperature and critical growth rate of Al is firstly calculated, and then the critical growth rate of AlGa<sub>N</sub> is obtained according to<sup>2</sup>

$$x = \frac{R_{Al}}{R_{Al} + R_{Ga}} \quad (1)$$

$$R_{AlGaN} = R_{Al} + R_{Ga} \quad (2)$$

where  $x$ ,  $R_{Al}$  and  $R_{Ga}$  are the Al composition (0.55 here), growth rate of Al and Ga, respectively.

**Table S1.** Related parameters in the calculation for Al<sub>0.55</sub>Ga<sub>0.45</sub>N.

| Parameter                                   | Value                                                                                                                                                                                                                                                                                                                                                                                            |
|---------------------------------------------|--------------------------------------------------------------------------------------------------------------------------------------------------------------------------------------------------------------------------------------------------------------------------------------------------------------------------------------------------------------------------------------------------|
| Lattice constant $a$                        | 0.3112 nm for AlN<br>0.3189 nm for GaN                                                                                                                                                                                                                                                                                                                                                           |
| Lattice constant $c$                        | 0.4982 nm for AlN<br>0.5186 nm for GaN                                                                                                                                                                                                                                                                                                                                                           |
| $\lambda_s$                                 | $\lambda_s = \lambda_e \exp\left(\frac{E_{ad} - E_d}{2kT}\right)$<br>$E_{ad} - E_d = 1.312 \text{ eV}^3$                                                                                                                                                                                                                                                                                         |
| Equilibrium constant for AlN                | $\text{Al(g)} + \text{NH}_3(\text{g}) \leftrightarrow \text{AlN(alloy)} + 3/2\text{H}_2(\text{g})$<br>$K_{AlN} = \frac{a_{AlN} P_{H_2}^{\frac{3}{2}}}{P_{Al} P_{NH_3}} = \exp\left(-\frac{\Delta G}{kT}\right)$<br>$\Delta G = 580480 + 112.6T \text{ J/mol}^4$                                                                                                                                  |
| Decomposition efficiency of NH <sub>3</sub> | 0.2 <sup>1</sup>                                                                                                                                                                                                                                                                                                                                                                                 |
| $\frac{n_{s0}}{\tau_s}$                     | $\frac{n_{s0}}{\tau_s} = \frac{P_{Al}}{\sqrt{2\pi m_{Al} kT}}$<br>$P_{Al}^4 + \left(2xB + \frac{8a_{AlN}^2}{xK_{AlN}^2}\right)P_{Al}^3 + \left(x^2B^2 - \frac{12Aa_{AlN}^2}{K_{AlN}^2}\right)P_{Al}^2$<br>$+ \frac{6a_{AlN}^2xA^2}{K_{AlN}^2}P_{Al} - \frac{a_{AlN}^2x^2}{K_{AlN}^2}A^3 = 0$<br>$A = \frac{2}{x}P_{Al}^0 + P_{H_2}^0 \quad \text{and} \quad B = P_{NH_3}^0 - \frac{P_{Al}^0}{x}$ |
| $R_{nuc}^*$                                 | $10^{12} - 10^{14} \text{ cm}^{-2} \text{ s}^{-1}$ <sup>5</sup>                                                                                                                                                                                                                                                                                                                                  |
| $V$                                         | $2.17 \times 10^{-23} \text{ cm}^3$                                                                                                                                                                                                                                                                                                                                                              |
| $\sigma$                                    | 14.9 eV/nm <sup>2</sup> for AlN (0001) <sup>3</sup><br>about 16 eV/nm <sup>2</sup> for GaN(0001) <sup>6</sup>                                                                                                                                                                                                                                                                                    |

## References

- 1 S. Washiyama, P. Reddy, F. Kaess, R. Kirste, S. Mita, R. Collazo, and Z. Sitar, J.

- Appl. Phys. **124**, 115304 (2018).
- 2 I. Bryan, Z. Bryan, S. Mita, A. Rice, L. Hussey, C. Shelton, J. Tweedie, J.-P. Maria, R. Collazo, and Z. Sitar, J. Cryst. Growth **451**, 65 (2016).
  - 3 I. Bryan, Z. Bryan, S. Mita, A. Rice, J. Tweedie, R. Collazo, and Z. Sitar, J. Cryst. Growth **438**, 81 (2016).
  - 4 A. Koukitu, N. Takahashi, and H. Seki, Jpn. J. Appl. Phys. Part 2 **36**, L1136 (1997).
  - 5 H. Matsunami and T. Kimoto, Mat. Sci. Eng. R **20**, 125 (1997).
  - 6 C. E. Dreyer, A. Janotti, and C. G. Van de Walle, Phys. Rev. B **89**, 081305(R) (2014).

## II. Growth of the DUV-LED structure on $0.5^\circ$ miscut sapphire

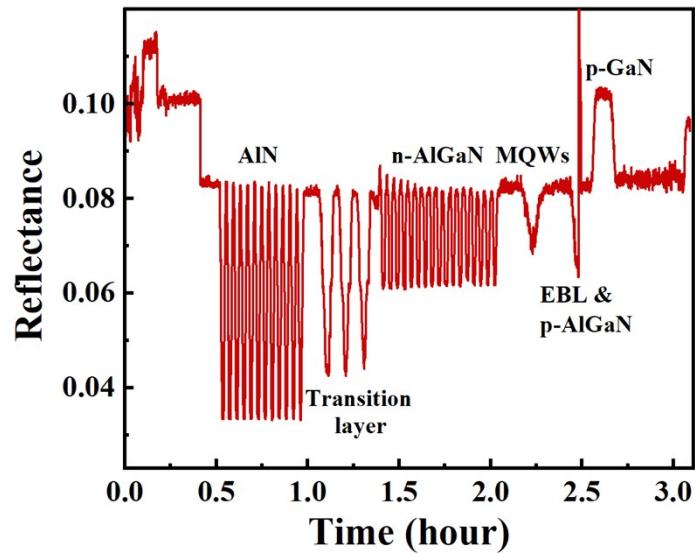

**Fig. S1.** In-situ optical reflectance (405 nm) curves for the DUV-LED structure on  $0.5^\circ$  miscut sapphire
